# Supplementary material
Source: PubMed Central journal article supplement (PMC2265116)
Supplement: pnas_0711591105_3.pdf [file pnas_0711591105_3.pdf]

|            | β-hairpin |   |   |   |   |   |   |   |   |   |   |   |   |   |   |          |   |   |   |   |   |   |   |   |   |   |   |   |   |   |   |   |   |      |
|------------|-----------|---|---|---|---|---|---|---|---|---|---|---|---|---|---|----------|---|---|---|---|---|---|---|---|---|---|---|---|---|---|---|---|---|------|
|            | Helix 2b  |   |   |   |   |   |   |   |   |   |   |   |   |   |   | Helix 3a |   |   |   |   |   |   |   |   |   |   |   |   |   |   |   |   |   |      |
| Mouse 1    | R         | S | D | A | A | K | R | L | L | E | A | S | A | D | A | N        | I | Q | D | N | M | G | R | T | P | L | H | A | A | V | S | A | D | 1962 |
| Rat 1      | R         | S | D | A | A | K | R | L | L | E | A | S | A | D | A | N        | I | Q | D | N | M | G | R | T | P | L | H | A | A | V | S | A | D | 1962 |
| Human 1    | R         | S | D | A | A | K | R | L | L | E | A | S | A | D | A | N        | I | Q | D | N | M | G | R | T | P | L | H | A | A | V | S | A | D | 1972 |
| Cow 1      | R         | S | D | A | A | K | R | L | L | E | A | S | A | D | A | N        | I | Q | D | N | M | G | R | T | P | L | H | A | A | V | S | A | D | 1967 |
| Chicken 1  | R         | S | D | A | A | K | R | L | L | E | A | S | A | D | A | N        | I | Q | D | N | M | G | R | T | P | L | H | A | A | V | S | A | D | 615  |
| Z' fish 1b | R         | S | D | A | A | K | R | L | L | E | S | C | A | D | A | N        | V | Q | D | N | M | G | R | T | P | L | H | A | A | V | A | A | D | 1950 |
| Drosophila | R         | A | D | A | A | K | R | L | L | D | A | G | A | D | A | N        | C | Q | D | N | T | G | R | T | P | L | H | A | A | V | A | A | D | 1995 |

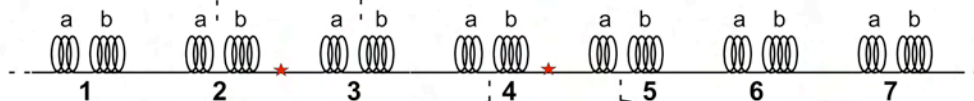

|            | β-hairpin |   |   |   |   |   |   |   |   |   |   |   |   |   |   |          |   |   |   |   |   |   |   |   |   |   |   |   |   |   |   |   |   |      |
|------------|-----------|---|---|---|---|---|---|---|---|---|---|---|---|---|---|----------|---|---|---|---|---|---|---|---|---|---|---|---|---|---|---|---|---|------|
|            | Helix 4b  |   |   |   |   |   |   |   |   |   |   |   |   |   |   | Helix 5a |   |   |   |   |   |   |   |   |   |   |   |   |   |   |   |   |   |      |
| Mouse 1    | V         | E | G | M | L | E | D | L | I | N | S | H | A | D | V | N        | A | V | D | D | L | G | K | S | A | L | H | W | A | A | A | V | N | 2027 |
| Rat 1      | V         | E | G | M | L | E | D | L | I | N | S | H | A | D | V | N        | A | V | D | D | L | G | K | S | A | L | H | W | A | A | A | V | N | 2027 |
| Human 1    | V         | E | G | M | L | E | D | L | I | N | S | H | A | D | V | N        | A | V | D | D | L | G | K | S | A | L | H | W | A | A | A | V | N | 2037 |
| Cow 1      | V         | E | G | M | L | E | D | L | I | N | S | H | A | D | V | N        | A | V | D | D | L | G | K | S | A | L | H | W | A | A | A | V | N | 2032 |
| Chicken    | V         | E | G | M | L | E | D | L | I | N | C | H | A | D | V | N        | A | V | D | D | L | G | K | S | A | L | H | W | A | A | A | V | N | 680  |
| Z' fish 1b | V         | E | G | M | V | E | E | L | I | N | C | H | A | D | V | N        | A | I | D | D | F | G | K | S | A | L | H | W | A | A | A | V | N | 2015 |
| Drosophila | I         | E | G | M | V | E | D | L | I | T | A | D | A | D | I | N        | A | A | D | N | S | G | K | T | A | L | H | W | A | A | A | V | N | 2060 |
