# Supplementary material
Source: PubMed Central journal article supplement (PMC2265116)

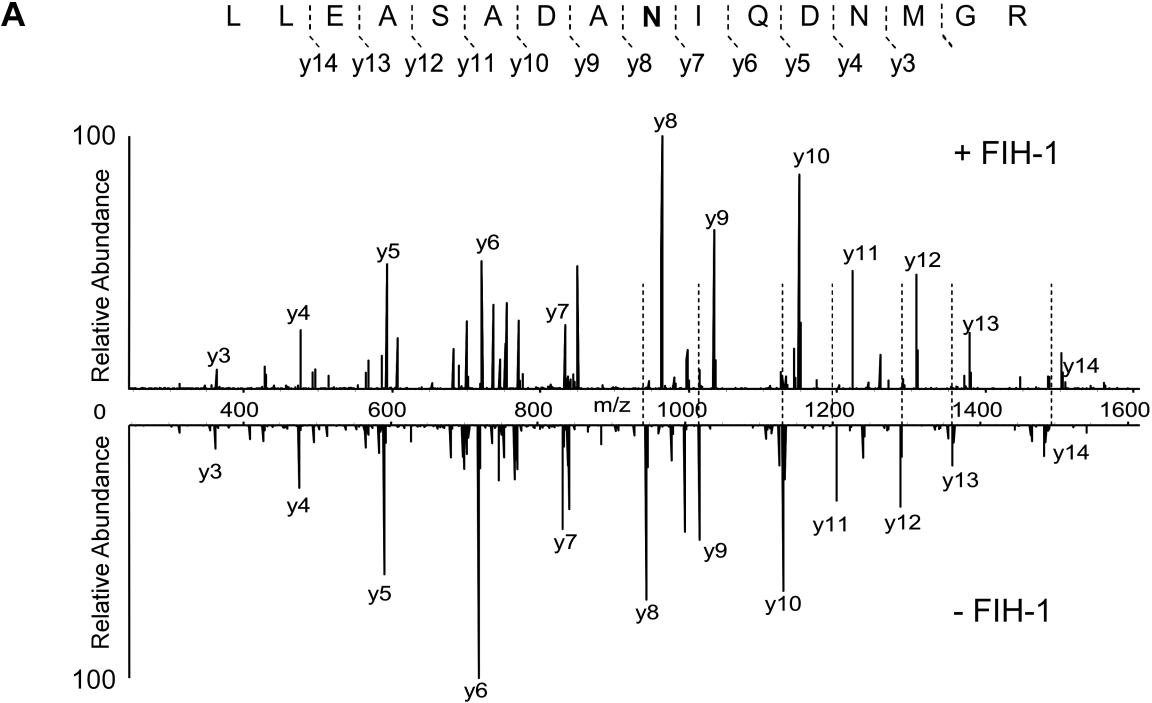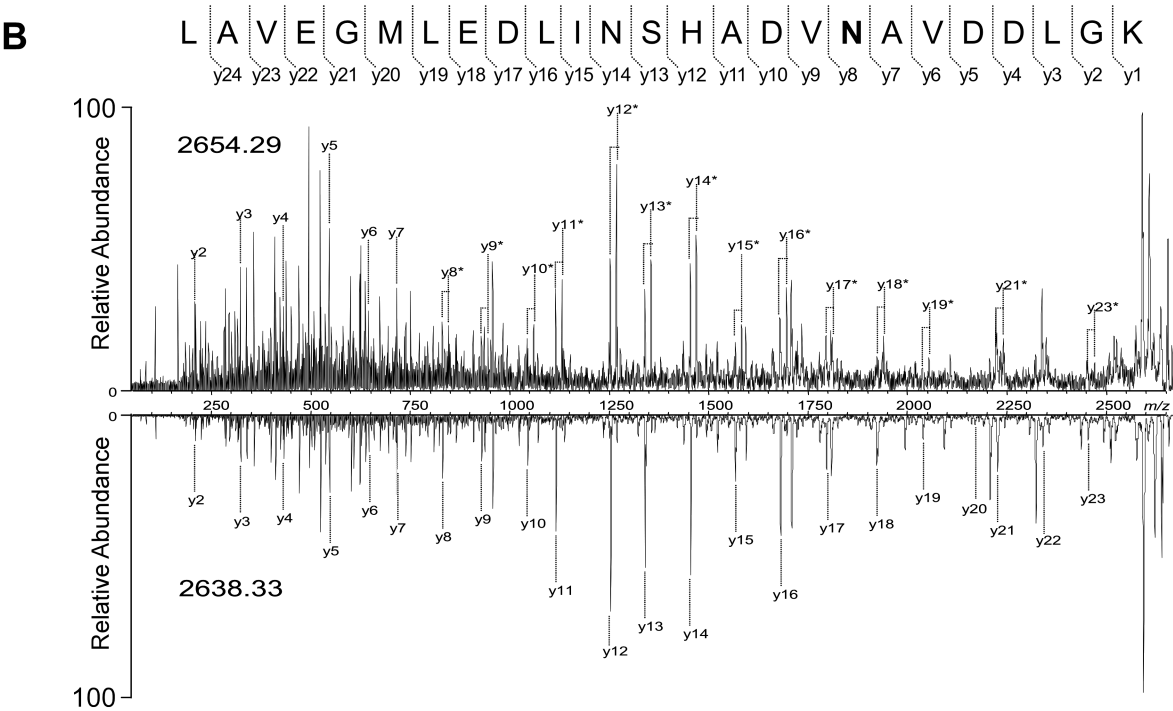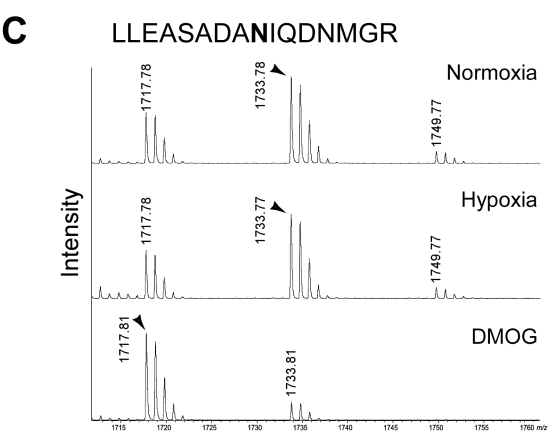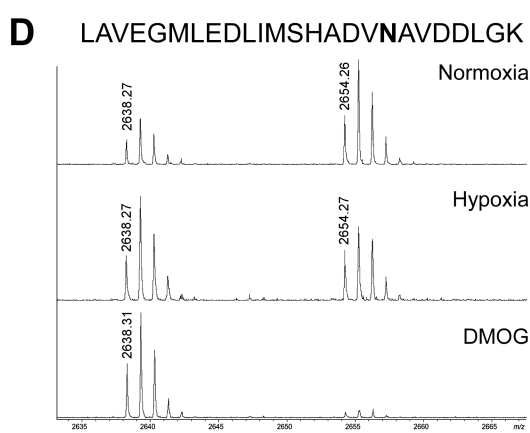

Supplement: pnas_0711591105_1.pdf [file pnas_0711591105_1.pdf]

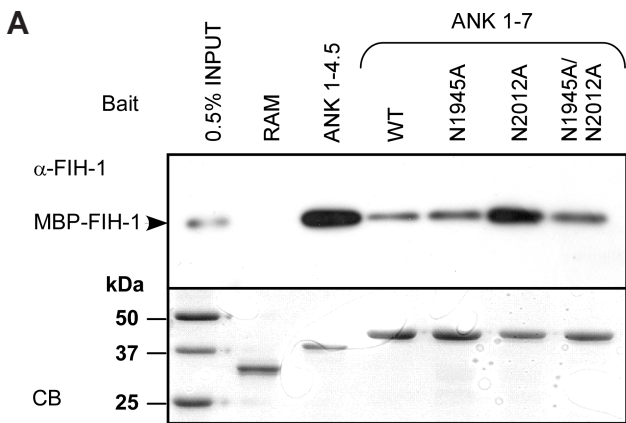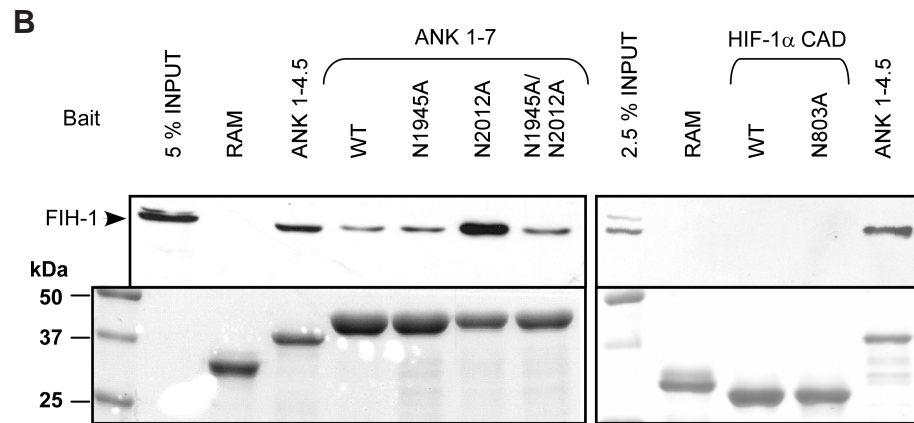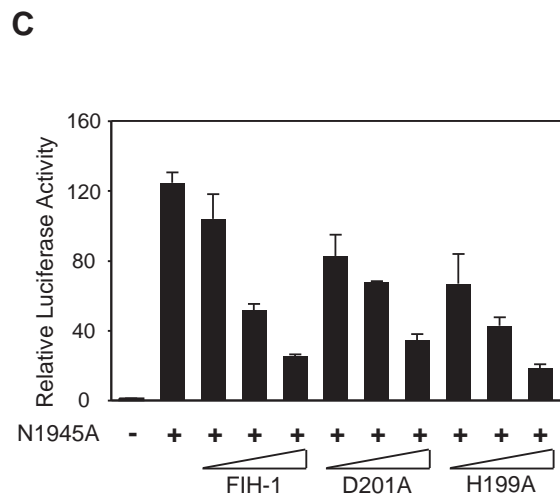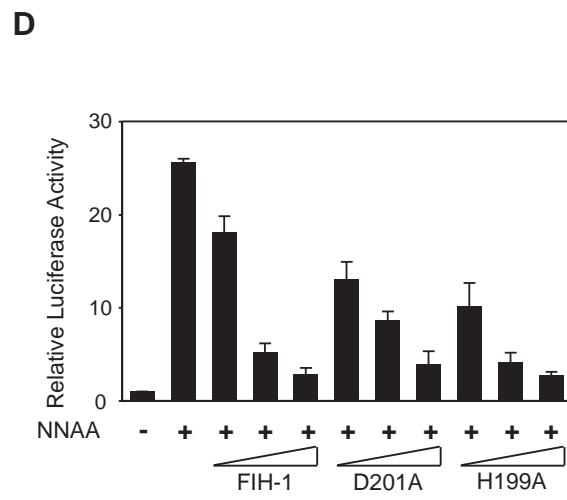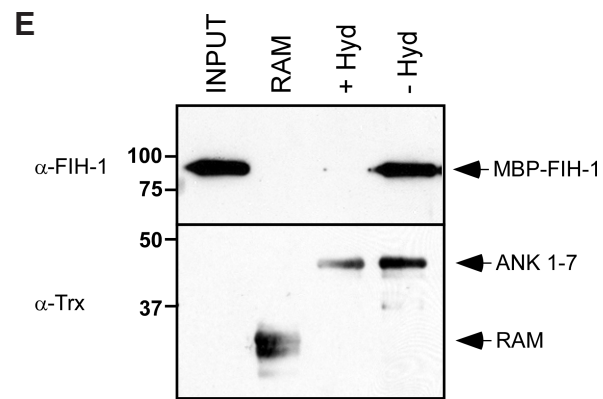

Supplement: pnas_0711591105_2.pdf [file pnas_0711591105_2.pdf]

**Electroporation****Sox3 HuC/D****Isl1/2 HuC/D****GFP**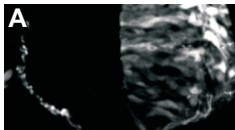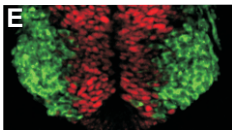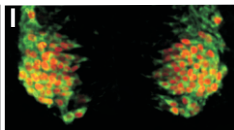**WT**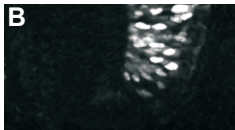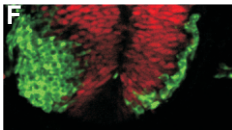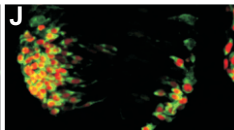**N1945A**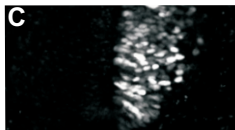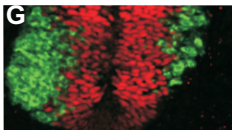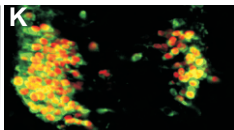**NNAA**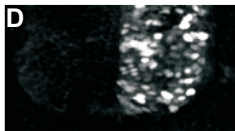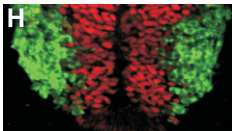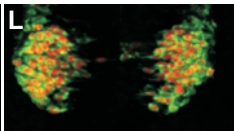

Supplement: pnas_0711591105_4.pdf [file pnas_0711591105_4.pdf]

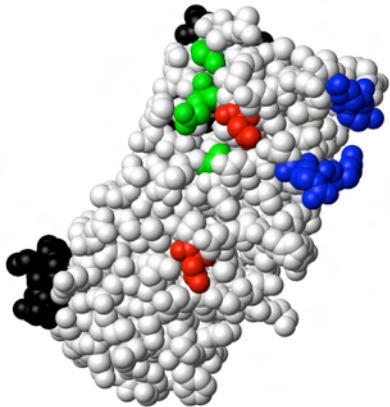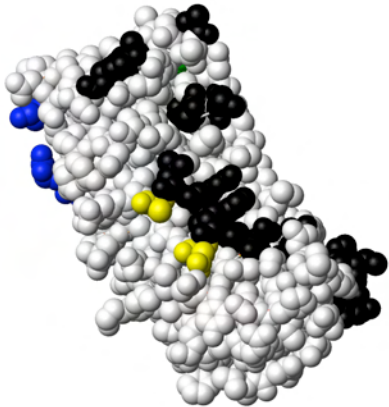

Supplement: pnas_0711591105_5.pdf [file pnas_0711591105_5.pdf]

Low Notch

High Notch

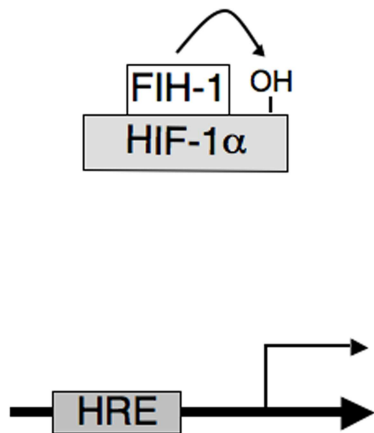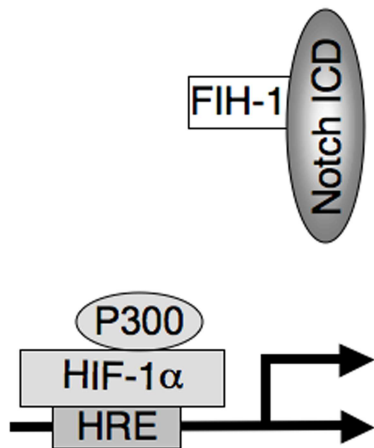

Supplement: pnas_0711591105_6.pdf [file pnas_0711591105_6.pdf]
